# Supplementary material for: Human In Silico Drug Trials Demonstrate Higher Accuracy than Animal Models in Predicting Clinical Pro-Arrhythmic Cardiotoxicity
Source: Front Physiol. 2017 Sep 12;8:668. doi: 10.3389/fphys.2017.00668 (PMC5601077; doi:10.3389/fphys.2017.00668)
Supplement: Supplementary file 3 [file Table3.xlsx]

## Sheet: Table_S3
Table S3. IC50 and Hill coefficient (h) values used as inputs for the 87 in silico drug trials. For each compound, the EFTPCmax and TdP risk category are also included. Data come from different sources, and all the references are listed in the table.

## Sheet: IC50
Compound List		IC50(h)REF, with IC50 in µM							EFTPCmax (µM)	TdP risk category
		INa	IKr	ICaL	INaL	IKs	Ito	IK1
1	Amiodarone I	15.9(0.97)³	0.86(1.09)³	1.9(0.69)3³					0.155#	1
	Amiodarone II	4.577(0.7)⁴	0.941(0.6)⁴	1.281(0.6)⁴	9.423(0.4)⁴		3.758(0.4)⁴
2	Astemizole	3(1.95)³	0.004(0.78)³	1.1(1.66)³					0.0003³	1
3	BaCl2		257(1)*¹					4.5(1)⁵	1##	0
4	Bepridil I	1(1.49)¹	0.09(1.21)²	1(1.28)³					0.035³	1
	Bepridil II	2.3(1.26)³	0.16(0.88)³	1(1.28)³
	Bepridil III	2.929(1.2)⁴	0.149(0.9)⁴	2.808(0.6)⁴	1.814(1.4)⁴
5	Ceftriaxone		445.7(1)³	153.8(1)³					23.17³	0
6	Chloropromazine I		1.5(1.4)³	3.4(1.73)³					0.038³	1
	Chloropromazine II		1.118(0.9)⁴	8.192(0.8)⁴	4.56(0.9)⁴			9.27(0.7)⁴
7	Cilostazol		13.8(0.91)³	91.2(1)³					0.128³	1
8	Cisapride I		0.02(1.04)³	11.8(1)³					0.003³	1
	Cisapride II		0.012(1.3)⁴
9	Clozapine	15.1(1.14)³	2.3(0.97)³	3.6(1)³					0.071³	2
10	Dasatinib	76.3(1.43)³	24.5(1.16)³	81.1(1)³					0.041³	2
11	Diazepam	306.4(1)³	53.2(1.07)³	30.5(0.89)³					0.029³	0
12	Diltiazem I	22.4(1.29)³	13.2(1.16)³	0.76(1.14)³					0.1275⁴	0
	Diltiazem II		6.569(0.8)⁴	0.112(0.7)⁴
13	Disopyramide	168.4(1.09)³	14.4(0.91)³	1036.7(1)³					0.742³	1
14	Dofetilide I	31.9(0.54)¹	0.013(1.56)¹	201(1)*¹		135(1)*¹	300(1)*¹		0.00213,4	1
	Dofetilide II	162.1(1)³	0.03(1.2)³	26.7(1)³
	Dofetilide III		0.001(0.6)⁴
15	Donepezil	38.5(1)³	0.7(0.98)³	34.3(0.83)³					0.007³	1
16	Droperidol	22.7(1.24)³	0.06(1.1)³	7.6(1.16)³					0.016³	1
17	Duloxetine	5.1(1.66)³	3.8(1.39)³	2.8(1.41)³					0.016³	0
18	Flecainide I	3.19(0.71)²	1.64(0.81)²	27.1(0.97)³					0.7523,4	1
	Flecainide II	6.2(1.14)³	1.5(0.88)³	27.1(0.97)³
	Flecainide III	6.677(1.9)⁴	0.692(0.8)⁴	25.599(1.4)⁴	18.87(0.6)⁴		9.266(0.7)⁴
19	Halofantrine	331.2(1)³	0.38(1.31)³	1.9(0.99)³					0.172³	1
20	Haloperidol	4.3(1.58)³	0.04(1.18)³	1.3(1.38)³					0.004³	1
21	Ibutilide	42.5(1.03)³	0.018(1.53)³	62.5(1.16)³					0.14³	1
22	Lamivudine	1571.4(1)³	2054(1)³	54.2(0.89)³					19.54³	0
23	Lidocaine I	44(0.94)²	300(1)*²						2.6⁴	0
	Lidocaine II	44(0.94)²	300(1)*²		10.79(1.3)⁴
24	Linezolid	2644.5(1)³	1147.2(1)³	105.4(0.94)³					59.11³	0
25	Loratadine	28.9(1.64)³	6.1(1.44)³	11.4(1.38)³					0.0004³	0
26	Methadone	31.8(1.37)³	3.5(1)³	37.4(1.67)³					0.507³	1
27	Metronidazole	2073.2(1)³	1340.2(1)³	177.9(0.66)³					187³	3
28	Mexiletine I	49.7(0.94)¹	69.4(1.11)¹	203(0.75)¹		32.6(0.92)¹	367(0.91)¹		2.5⁴	0
	Mexiletine II	49.7(0.94)¹	69.4(1.11)¹	203(0.75)¹	8.957(1.4)⁴	32.6(0.92)¹	367(0.91)¹
29	Mibefradil I	5.6(1.53)³	1.7(1.38)³	0.51(1.44)³					0.012³	0
	Mibefradil II	5.866(1)⁴	0.307(0.9)⁴	0.652(1.1)⁴	3.628(1.2)⁴
30	Mitoxantrone	93.5(1.05)³	539.4(1)³	22.5(0.64)³					0.225³	0
31	Moxifloxacin I	1563(1)*¹	79(1)¹	173(1)³					10.96³	1
	Moxifloxacin II	1112(1)³	86.2(0.94)³	173(1)³
	Moxifloxacin III		93.041(0.6)⁴		382.337(1.1)⁴	50.321(1)⁴
32	Nifedinipine	88.5(0.71)³	44(0.8)³	0.012(1.02)³					0.008³	0
33	Nilotinib I	13.3(2.11)³	1(0.96)³	17.5(1)³					0.172³	2
	Nilotinib II		0.091(0.8)⁴		4.706(1.9)⁴
34	Nimodipine		45.6(1)*¹	0.139(0.63)⁶					0.001#	0
35	Nisoldipine	45(0.72)¹	49.3(0.84)¹	0.009(0.71)¹	61.7(0.71)¹	52.8(1.03)¹			0.0001#	0
36	Nitrendipine	21.6(1.25)³	24.6(0.82)³	0.025(0.78)³					0.003³	0
37	Paliperidone	109(1.33)³	0.78(1.01)³	193.9(1)³					0.069³	2
38	Paroxetine	9.8(1.34)³	1.9(1.26)³	3.9(1.39)³					0.014³	3
39	Pentobarbital	2686(1)³	1433.9(1)³	299(1.38)³					5.171³	0
40	Phenytoin	72.4(1.06)³	147(1)³	21.9(0.99)³					4.36³	0
42	Pimozide	1.1(1.05)³	0.04(1.16)³	0.24(1.49)³					0.0005³	1
43	Piperacillin	2433.8(1)³	3405.1(1)³	1226(1)³					114ᴺ	0
41	Primidone	640(1)*¹	3360(1)*¹						20.6#	0
44	Procainamide	746.6(1)³	272.4(1)³	389.5(0.83)³					54.18³	1
45	Quinidine	14.6(1.22)³	0.72(1.06)³	6.4(0.68)³					3.237³	1
	Quinidine		0.343(1)⁴			4.899(1.4)⁴	3.487(1.3)⁴
46	Raltegravir	824.2(1)³	782.8(1)³	246.7(1)³					7³	0
47	Ranolazine	30.2(0.8)¹	10.9(0.9)¹	172(0.6)¹	5.9(1)⁷				1.95⁴	3
	Ranolazine		6.49(0.8)⁴		7.887(0.9)⁴
48	Ribavirin	2997.5(1)³	967(1)³	622.5(1)³					27.88³	0
49	Risperidone	43.3(0.98)³	0.26(0.99)³	34.2(0.79)³					0.002³,ᴺ	2
50	Saquinavir	12.1(2.34)³	16.9(1.72)³	1.9(1.15)³					0.4172⁴	2
	Saquinavir	15.568(1.2)⁴	3.477(1)⁴	3.161(1.4)⁴	7.088(1.2)⁴
51	Sertindole I	6.9(1.19)³	0.033(1.25)³	6.3(1.29)³					0.002³	2
	Sertindole II		0.011(0.8)⁴
52	Sitagliptin	1220.8(1)³	174.7(1)³	147.1(1)³					0.442³	0
53	Solifenacin	1.5(1.32)³	0.28(0.9)³	4.3(1.47)³					0.003³	2
54	Sotalol I	7013.9(1)³	111.4(0.73)³	193.3(1)³					14.693,4	1
	Sotalol II		86.369(0.9)⁴
55	Sparfloxacin I	1465(1)*¹	17.7(0.99)¹	88.8(1)³					1.766³	1
	Sparfloxacin II	2555(1)³	22.1(0.93)³	88.8(1)³
56	Sunitinib	16.5(1.22)³	1.2(1)³	33.4(1.09)³					0.013³	2
57	Telbivudine	1095.2(1)³	422.7(1)³	713.9(1)³					19.72³	0
58	Terfenadine I	2(1.81)³	0.05(1.15)³	0.93(1.8)³					0.009³	1
	Terfenadine II		0.019(0.6)⁴	0.7(0.7)⁴
59	Terodiline	7.4(1.23)³	0.65(1.02)³	4.8(1.01)³					0.145³	1
60	Thioridazine	1.4(1.11)³	0.5(0.98)³	3.5(1.35)³					0.98³	1
61	Verapamil I	32.5(1.33)³	0.25(0.89)³	0.2(0.8)³					0.088³	NC
	Verapamil II	7.2(0.95)⁸	0.83(1.17)⁸	0.1(0.7)⁸	6.1(1.24)⁸	65.6(0.92)⁸		9.03(1)⁸
	Verapamil III		0.499(1.1)⁴	0.202(1.1)⁴
62	Voriconazole	1550.5(1)³	490.9(1)³	414.2(1)³					7.563³	3

## Sheet: Notes
*	The IC50 concentration was not reached in the experiments, and an estimate was computed from the percentage of block at the maximum tested concentration, with h equal to 1.
#	The EFTPCmax was estimated from Cmax and percentage of protein binding from literature:
	Amiodarone
	The EFTPCmax for Amiodarone was computed by considering Cmax=2.5 µg/ml3 and protein binding 96%10
	Nimodipine
	The EFTPCmax for Nimodipine was computed by considering Cmax=10.2 ng/ml9 and protein binding 95%10
	Nisoldipine
	The EFTPCmax for Nisolddipine was computed by considering Cmax=5 ng/ml11 and protein binding 99%10
	Piperacillin
	The EFTPCmax for Piperacillin was computed by considering Cmax=70 µg/ml12 and protein binding 16%3
	Primidone
	The EFTPCmax for Primidone was computed by considering Cmax=15 µg/ml12 and protein binding 70%10
##	Since BaCl2 is not a clinical drug, we considered EFTPCmax= 1µM
N	Risperidone
	In silico drug trials for Risperidone were run by considering the active moiety of Risperidone and its 9-OH metabolite (Paliperidone), which also affects cardiac ion channels. Patients taking Risperidone orally ehibit plasma level of Paliperidone up to 10 times higher than their plase level of Risperidone13.
	TdP Risk Category from CredibleMeds14
1	High TdP Risk: the drug prolongs the QT interval and is clearly associated with a known TdP risk, even when taken as recommended
2	Possible TdP Risk: the drug prolongs the QT interval, but there is a lack of evidence of TdP risk when taken as recommended
3	Conditional TdP Risk: the drug is associated with TdP but only under certain circumstances, e.g. excessive dose or interaction with other drugs
0	No TdP Risk: the drug is not included in any of the CredibleMeds TdP risk categories
NC	Not Classified: the drug was reviewed by CredibleMeds but the evidence available was not enough to assign it to any of the previous categories

## Sheet: References
1	Janssen Pharmaceutical internal data base (automated patch-clamp experiments)
2	Janssen Pharmaceutical internal data base (manual patch-clamp experiments)
3	Kramer, J. et al. MICE models: superior to the HERG model in predicting Torsade de Pointes. Sci. Rep. 3, 2100 (2013).
4	Crumb, W. J., Vicente, J., Johannesen, L. & Strauss, D. G. An evaluation of 30 clinical drugs against the comprehensive in vitro Proarrhythmia assay proposed ion channel panel. J. Pharmacol. Toxicol. Methods 81, 251–262 (2016).
5	Schram, G., Pourrier, M., Wang, Z., White, M. & Nattel, S. Barium block of Kir2 and human cardiac inward rectifier currents: evidence for subunit-heteromeric contribution to native currents. Cardiovasc. Res. 59, 328–338 (2003).
6	Xu, W. & Lipscombe, D. Neuronal Ca(V)1.3alpha(1) L-Type Channels Activate at Relatively Hyperpolarized Membrane Potentials and Are Incompletely Inhibited by Dihydropyridines. J. Neurosci. 21, 5944–5951 (2001).
7	Antzelevitch, C. et al. Electrophysiological effects of ranolazine, a novel antianginal agent with antiarrhythmic properties. Circulation 110, 904–910 (2004).
8	Obejero-Paz, C. A. et al. Quantitative Profiling of the Effects of Vanoxerine on Human Cardiac Ion Channels and its Application to Cardiac Risk. Sci. Rep. 5, 17623 (2015).
9	Hernández-Hernández, R. et al. Comparison of two nimodipine formulations in healthy volunteers. J. Hum. Hypertens. 16 Suppl 1, S142-144 (2002).
10	Wishart, D. S. et al. DrugBank: a comprehensive resource for in silico drug discovery and exploration. Nucleic Acids Res. 34, D668-672 (2006).
11	Baksi, A., Edwards, J. & Ahr, G. A comparison of the pharmacokinetics of nisoldipine in elderly and young subjects. Br. J. Clin. Pharmacol. 31, 367–370 (1991).
12	Schulz, M. & Schmoldt, A. Therapeutic and toxic blood concentrations of more than 800 drugs and other xenobiotics. Pharmazie 58, 447–474 (2003).
13	Álamo, C. & López-Muñoz, F. Clinical and Experimental Pharmacology The Pharmacological Role and Clinical Applications of Antipsychotics’ Active Metabolites: Paliperidone versus Risperidone. Clin Exp Pharmacol 3, (2013).
14	Woosley, R., and Romer, K. (1999). www.crediblemeds.org, QTdrugs List. AZCERT, Inc. 1822 Innov. Park Dr., Oro Val. AZ 85755. Available online at: www.crediblemeds.org (Accessed July 1, 2017).
